# Supplementary material for: Evaluation of real-life use of Point-Of-Care Rapid Antigen TEsting for SARS-CoV-2 in schools (EPOCRATES)
Source: bioRxiv or medRxiv preprint supplement (doi:10.1101/2021.10.13.21264960), 2022-01-23

Distribution of non-index cases linked to an outbreak according to the time (days) needed for their symptoms to appear or to test positive

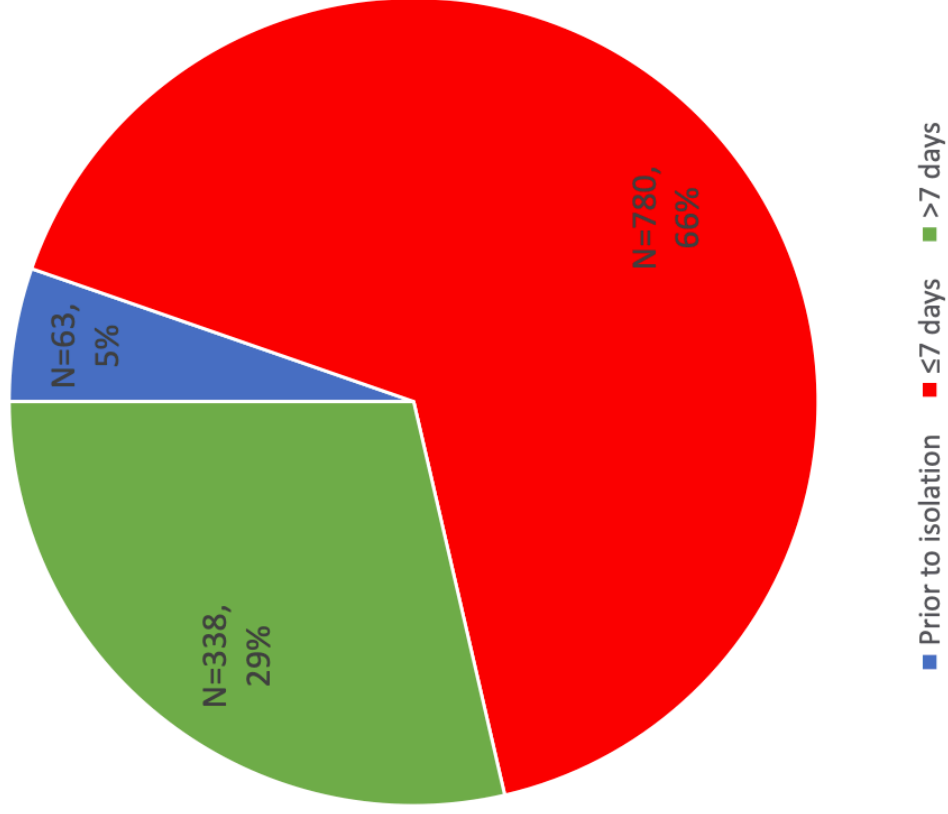

Supplement: Supplementary file [file media-4.pdf]
